# Supplementary material
Source: ML conference proceedings conference paper supplement (https://openreview.net/forum?id=4351SumKS9)
Supplement: supplementary_material [file attachment]

# CUBE Datacard

## CUBE

(Cultural Benchmark for T2I models)

**Data Card Authors:** Redacted for anonymity

CUBE is created to evaluate the cultural competency of text-to-image models. CUBE consists of CUBE-CSpace which is a broad collection of ~300k cultural artifacts along with their national association and domain, spanning 8 countries and 3 cultural domains. A subset of popular artifacts from CUBE-CSpace is made into T2I prompts, called CUBE-1K, intended to evaluate cultural awareness of T2I models. CUBE (CUBE-CSpace and CUBE-1K) is intended to be used for evaluation purposes only with a potential to guide future cultural data collection.

## Data Card

| Publishing Status                                                                                                                                                                                                                                                                                                                                                                                                  | Team(s)                                                                                                                                                                                                                                                                                                                                                          | Contact Detail(s)       |       |                 |        |                     |         |                  |   |                                                                                                                                                                                                                                                                                                                                                                                                                                   |
|--------------------------------------------------------------------------------------------------------------------------------------------------------------------------------------------------------------------------------------------------------------------------------------------------------------------------------------------------------------------------------------------------------------------|------------------------------------------------------------------------------------------------------------------------------------------------------------------------------------------------------------------------------------------------------------------------------------------------------------------------------------------------------------------|-------------------------|-------|-----------------|--------|---------------------|---------|------------------|---|-----------------------------------------------------------------------------------------------------------------------------------------------------------------------------------------------------------------------------------------------------------------------------------------------------------------------------------------------------------------------------------------------------------------------------------|
| <ul style="list-style-type: none"><li>Internal Only: No external references available</li><li>Internal Only: Dataset is externally unpublished but external references are available</li><li>Internal Version: A version of the dataset is externally published</li><li>External Version: This is an externally published version of an internal dataset</li><li>External Only: Dataset is external only</li></ul> | Redacted for anonymity                                                                                                                                                                                                                                                                                                                                           | Redacted for anonymity  |       |                 |        |                     |         |                  |   |                                                                                                                                                                                                                                                                                                                                                                                                                                   |
| Data Subject(s)                                                                                                                                                                                                                                                                                                                                                                                                    | Dataset Snapshot                                                                                                                                                                                                                                                                                                                                                 | Description of Content  |       |                 |        |                     |         |                  |   |                                                                                                                                                                                                                                                                                                                                                                                                                                   |
| <ul style="list-style-type: none"><li>Sensitive Data about people</li><li>Non-Sensitive Data about people</li><li>Data about natural phenomena</li><li>Data about places and objects</li><li>Synthetically generated data</li><li>Data about systems or products and their behaviors</li><li>Unknown</li><li>Others:</li><li>Please Specify</li></ul>                                                              | <b>CUBE-CSpace</b><br><br><table><thead><tr><th>Dataset Characteristics</th><th>Value</th></tr></thead><tbody><tr><td>Size of dataset</td><td>88.8MB</td></tr><tr><td>Number of Instances</td><td>295,287</td></tr><tr><td>Number of Fields</td><td>8</td></tr></tbody></table> <b>Above:</b> Dataset Statistics of CUBE-CSpace<br><br><b>Field Description:</b> | Dataset Characteristics | Value | Size of dataset | 88.8MB | Number of Instances | 295,287 | Number of Fields | 8 | <b>CUBE-CSpace</b><br><br>A collection of ~300k cultural artifacts that are nodes in the WikiData Knowledge Base.<br><br>The artifacts were collected by traversing the KB from manually selected parent nodes along the 'instance of' (P31) and 'subclass of' (P279) edges.<br><br>Each cultural artifact additionally contains a country association that is present in field 'country-of-origin' (P495) and/or 'country' (P17) |
| Dataset Characteristics                                                                                                                                                                                                                                                                                                                                                                                            | Value                                                                                                                                                                                                                                                                                                                                                            |                         |       |                 |        |                     |         |                  |   |                                                                                                                                                                                                                                                                                                                                                                                                                                   |
| Size of dataset                                                                                                                                                                                                                                                                                                                                                                                                    | 88.8MB                                                                                                                                                                                                                                                                                                                                                           |                         |       |                 |        |                     |         |                  |   |                                                                                                                                                                                                                                                                                                                                                                                                                                   |
| Number of Instances                                                                                                                                                                                                                                                                                                                                                                                                | 295,287                                                                                                                                                                                                                                                                                                                                                          |                         |       |                 |        |                     |         |                  |   |                                                                                                                                                                                                                                                                                                                                                                                                                                   |
| Number of Fields                                                                                                                                                                                                                                                                                                                                                                                                   | 8                                                                                                                                                                                                                                                                                                                                                                |                         |       |                 |        |                     |         |                  |   |                                                                                                                                                                                                                                                                                                                                                                                                                                   |

|  |                                                                                                                                                                                                                                                                                                                                                                                                                                                                                                                                                            |
|--|------------------------------------------------------------------------------------------------------------------------------------------------------------------------------------------------------------------------------------------------------------------------------------------------------------------------------------------------------------------------------------------------------------------------------------------------------------------------------------------------------------------------------------------------------------|
|  | <div><div><div><div><div><b>Field 1.</b></div><div>P31</div></div><div><div>Wikidata property 'instance of' of the artifact node</div></div></div><div><div><b>Field 2.</b></div><div>P279</div></div><div><div>Wikidata property subclass of' of the artifact node</div></div></div><div><div><b>Field 3.</b></div><div>P495</div></div><div><div>Wikidata property 'country-of-origin' of the artifact node</div></div></div> <div><div><b>Field 4.</b></div><div>P17</div></div> <div><div>Wikidata property 'country' of the artifact node</div></div> |
|--|------------------------------------------------------------------------------------------------------------------------------------------------------------------------------------------------------------------------------------------------------------------------------------------------------------------------------------------------------------------------------------------------------------------------------------------------------------------------------------------------------------------------------------------------------------|

**Field 5.**

P361

Wikidata property 'part of' of the artifact node

**Field 6.**

id

Wikidata id of the artifact node e.g. Q920940

**Field 7.**

parent node name

Name of parent node in Wikidata. Indicates node from where the traversal was started to reach the artifact node.

**Field 8.**

name

Name of artifact node in Wikidata

|  |                                                                                                                                                                                                                                                                                                                                             |  |
|--|---------------------------------------------------------------------------------------------------------------------------------------------------------------------------------------------------------------------------------------------------------------------------------------------------------------------------------------------|--|
|  | <div>artifact</div> <div><b>Field 2.</b> domainDomain of artifact</div> <div><b>Field 3.</b> artifact nameName of artifact name</div> <div><b>Field 4.</b> promptT2I prompt containing the artifact</div> <div><b>Additional Notes:</b> CUBE-1K contains a subset of 1000 artifacts from CUBE-CSpace. Both datasets cover 8 countries</div> |  |
|--|---------------------------------------------------------------------------------------------------------------------------------------------------------------------------------------------------------------------------------------------------------------------------------------------------------------------------------------------|--|

| Primary Data Modality                                                                                                                                                                                                                                                                                                                                                               | Example Data Point                                                                                                                                                                                                                                                                                                                                                                                                                                                                                                                                                                                                                                                                                                                                | Data Fields                  |       |     |                           |      |                                  |      |         |     |         |      |   |    |        |                  |      |      |           |       |       |         |       |        |         |                                                                                                                                                                                                                                                                                                                                                                                                                                                                                                                                                                                                                                                                                                                                                                                                                                                                                                                                                                                                                                                                                        |            |                      |             |     |                  |                        |      |          |                        |      |                 |                              |     |             |                    |      |           |                    |    |           |                     |                  |                     |                     |      |                |               |            |                      |             |         |               |                  |
|-------------------------------------------------------------------------------------------------------------------------------------------------------------------------------------------------------------------------------------------------------------------------------------------------------------------------------------------------------------------------------------|---------------------------------------------------------------------------------------------------------------------------------------------------------------------------------------------------------------------------------------------------------------------------------------------------------------------------------------------------------------------------------------------------------------------------------------------------------------------------------------------------------------------------------------------------------------------------------------------------------------------------------------------------------------------------------------------------------------------------------------------------|------------------------------|-------|-----|---------------------------|------|----------------------------------|------|---------|-----|---------|------|---|----|--------|------------------|------|------|-----------|-------|-------|---------|-------|--------|---------|----------------------------------------------------------------------------------------------------------------------------------------------------------------------------------------------------------------------------------------------------------------------------------------------------------------------------------------------------------------------------------------------------------------------------------------------------------------------------------------------------------------------------------------------------------------------------------------------------------------------------------------------------------------------------------------------------------------------------------------------------------------------------------------------------------------------------------------------------------------------------------------------------------------------------------------------------------------------------------------------------------------------------------------------------------------------------------------|------------|----------------------|-------------|-----|------------------|------------------------|------|----------|------------------------|------|-----------------|------------------------------|-----|-------------|--------------------|------|-----------|--------------------|----|-----------|---------------------|------------------|---------------------|---------------------|------|----------------|---------------|------------|----------------------|-------------|---------|---------------|------------------|
| <ul style="list-style-type: none"><li>Image Data</li><li>Text Data</li><li>Tabular Data</li><li>Audio Data</li><li>Video Data</li><li>Time Series</li><li>Graph Data</li><li>Geospatial Data</li><li>Multimoda<ul style="list-style-type: none"><li>Please specify</li></ul></li><li>Unknown</li><li>Others<ul style="list-style-type: none"><li>Please specify</li></ul></li></ul> | <table><tr><th>Field</th><th>Value</th></tr><tr><td>P31</td><td>['Q2625877', 'Q15846908']</td></tr><tr><td>P279</td><td>['Q178', 'Q27555297', 'Q192874']</td></tr><tr><td>P495</td><td>['Q38']</td></tr><tr><td>P17</td><td>['Q38']</td></tr><tr><td>P361</td><td>-</td></tr><tr><td>id</td><td>Q20026</td></tr><tr><td>parent node name</td><td>dish</td></tr><tr><td>name</td><td>Spaghetti</td></tr></table> <p><b>Above:</b> Example datapoint in CUBE-CSpace</p> <p><b>Additional Note:</b> Values starting Q38 is the Italy node in WikiData. All values starting with 'Q' represent WikiData nodes</p> <table><tr><th>Field</th><th>Value</th></tr><tr><td>country</td><td>Italy</td></tr><tr><td>domain</td><td>Cuisine</td></tr></table> | Field                        | Value | P31 | ['Q2625877', 'Q15846908'] | P279 | ['Q178', 'Q27555297', 'Q192874'] | P495 | ['Q38'] | P17 | ['Q38'] | P361 | - | id | Q20026 | parent node name | dish | name | Spaghetti | Field | Value | country | Italy | domain | Cuisine | <table><tr><th>Field name</th><th>Example field values</th><th>Description</th></tr><tr><td>P31</td><td>'Q2095', 'Q7802'</td><td>Property 'instance of'</td></tr><tr><td>P279</td><td>'Q13270'</td><td>Property 'subclass of'</td></tr><tr><td>P495</td><td>'Q8646', 'Q155'</td><td>Property 'country-of-origin'</td></tr><tr><td>P17</td><td>'Q155', Q38</td><td>Property 'country'</td></tr><tr><td>P361</td><td>'Q614394'</td><td>Property 'part of'</td></tr><tr><td>id</td><td>Q16493207</td><td>Wiki ID of artifact</td></tr><tr><td>parent node name</td><td>type of dance, dish</td><td>Name of parent node</td></tr><tr><td>name</td><td>Odissi, Osechi</td><td>Artifact name</td></tr></table> <p><b>Above:</b> Field description and example field values in CUBE-CSpace</p> <p><b>Additional Note:</b> Values starting with 'Q' represent WikiData node IDs. For example, Q155 is the Brazil node</p> <table><tr><th>Field name</th><th>Example field values</th><th>Description</th></tr><tr><td>country</td><td>Brazil, India</td><td>Artifact country</td></tr></table> | Field name | Example field values | Description | P31 | 'Q2095', 'Q7802' | Property 'instance of' | P279 | 'Q13270' | Property 'subclass of' | P495 | 'Q8646', 'Q155' | Property 'country-of-origin' | P17 | 'Q155', Q38 | Property 'country' | P361 | 'Q614394' | Property 'part of' | id | Q16493207 | Wiki ID of artifact | parent node name | type of dance, dish | Name of parent node | name | Odissi, Osechi | Artifact name | Field name | Example field values | Description | country | Brazil, India | Artifact country |
| Field                                                                                                                                                                                                                                                                                                                                                                               | Value                                                                                                                                                                                                                                                                                                                                                                                                                                                                                                                                                                                                                                                                                                                                             |                              |       |     |                           |      |                                  |      |         |     |         |      |   |    |        |                  |      |      |           |       |       |         |       |        |         |                                                                                                                                                                                                                                                                                                                                                                                                                                                                                                                                                                                                                                                                                                                                                                                                                                                                                                                                                                                                                                                                                        |            |                      |             |     |                  |                        |      |          |                        |      |                 |                              |     |             |                    |      |           |                    |    |           |                     |                  |                     |                     |      |                |               |            |                      |             |         |               |                  |
| P31                                                                                                                                                                                                                                                                                                                                                                                 | ['Q2625877', 'Q15846908']                                                                                                                                                                                                                                                                                                                                                                                                                                                                                                                                                                                                                                                                                                                         |                              |       |     |                           |      |                                  |      |         |     |         |      |   |    |        |                  |      |      |           |       |       |         |       |        |         |                                                                                                                                                                                                                                                                                                                                                                                                                                                                                                                                                                                                                                                                                                                                                                                                                                                                                                                                                                                                                                                                                        |            |                      |             |     |                  |                        |      |          |                        |      |                 |                              |     |             |                    |      |           |                    |    |           |                     |                  |                     |                     |      |                |               |            |                      |             |         |               |                  |
| P279                                                                                                                                                                                                                                                                                                                                                                                | ['Q178', 'Q27555297', 'Q192874']                                                                                                                                                                                                                                                                                                                                                                                                                                                                                                                                                                                                                                                                                                                  |                              |       |     |                           |      |                                  |      |         |     |         |      |   |    |        |                  |      |      |           |       |       |         |       |        |         |                                                                                                                                                                                                                                                                                                                                                                                                                                                                                                                                                                                                                                                                                                                                                                                                                                                                                                                                                                                                                                                                                        |            |                      |             |     |                  |                        |      |          |                        |      |                 |                              |     |             |                    |      |           |                    |    |           |                     |                  |                     |                     |      |                |               |            |                      |             |         |               |                  |
| P495                                                                                                                                                                                                                                                                                                                                                                                | ['Q38']                                                                                                                                                                                                                                                                                                                                                                                                                                                                                                                                                                                                                                                                                                                                           |                              |       |     |                           |      |                                  |      |         |     |         |      |   |    |        |                  |      |      |           |       |       |         |       |        |         |                                                                                                                                                                                                                                                                                                                                                                                                                                                                                                                                                                                                                                                                                                                                                                                                                                                                                                                                                                                                                                                                                        |            |                      |             |     |                  |                        |      |          |                        |      |                 |                              |     |             |                    |      |           |                    |    |           |                     |                  |                     |                     |      |                |               |            |                      |             |         |               |                  |
| P17                                                                                                                                                                                                                                                                                                                                                                                 | ['Q38']                                                                                                                                                                                                                                                                                                                                                                                                                                                                                                                                                                                                                                                                                                                                           |                              |       |     |                           |      |                                  |      |         |     |         |      |   |    |        |                  |      |      |           |       |       |         |       |        |         |                                                                                                                                                                                                                                                                                                                                                                                                                                                                                                                                                                                                                                                                                                                                                                                                                                                                                                                                                                                                                                                                                        |            |                      |             |     |                  |                        |      |          |                        |      |                 |                              |     |             |                    |      |           |                    |    |           |                     |                  |                     |                     |      |                |               |            |                      |             |         |               |                  |
| P361                                                                                                                                                                                                                                                                                                                                                                                | -                                                                                                                                                                                                                                                                                                                                                                                                                                                                                                                                                                                                                                                                                                                                                 |                              |       |     |                           |      |                                  |      |         |     |         |      |   |    |        |                  |      |      |           |       |       |         |       |        |         |                                                                                                                                                                                                                                                                                                                                                                                                                                                                                                                                                                                                                                                                                                                                                                                                                                                                                                                                                                                                                                                                                        |            |                      |             |     |                  |                        |      |          |                        |      |                 |                              |     |             |                    |      |           |                    |    |           |                     |                  |                     |                     |      |                |               |            |                      |             |         |               |                  |
| id                                                                                                                                                                                                                                                                                                                                                                                  | Q20026                                                                                                                                                                                                                                                                                                                                                                                                                                                                                                                                                                                                                                                                                                                                            |                              |       |     |                           |      |                                  |      |         |     |         |      |   |    |        |                  |      |      |           |       |       |         |       |        |         |                                                                                                                                                                                                                                                                                                                                                                                                                                                                                                                                                                                                                                                                                                                                                                                                                                                                                                                                                                                                                                                                                        |            |                      |             |     |                  |                        |      |          |                        |      |                 |                              |     |             |                    |      |           |                    |    |           |                     |                  |                     |                     |      |                |               |            |                      |             |         |               |                  |
| parent node name                                                                                                                                                                                                                                                                                                                                                                    | dish                                                                                                                                                                                                                                                                                                                                                                                                                                                                                                                                                                                                                                                                                                                                              |                              |       |     |                           |      |                                  |      |         |     |         |      |   |    |        |                  |      |      |           |       |       |         |       |        |         |                                                                                                                                                                                                                                                                                                                                                                                                                                                                                                                                                                                                                                                                                                                                                                                                                                                                                                                                                                                                                                                                                        |            |                      |             |     |                  |                        |      |          |                        |      |                 |                              |     |             |                    |      |           |                    |    |           |                     |                  |                     |                     |      |                |               |            |                      |             |         |               |                  |
| name                                                                                                                                                                                                                                                                                                                                                                                | Spaghetti                                                                                                                                                                                                                                                                                                                                                                                                                                                                                                                                                                                                                                                                                                                                         |                              |       |     |                           |      |                                  |      |         |     |         |      |   |    |        |                  |      |      |           |       |       |         |       |        |         |                                                                                                                                                                                                                                                                                                                                                                                                                                                                                                                                                                                                                                                                                                                                                                                                                                                                                                                                                                                                                                                                                        |            |                      |             |     |                  |                        |      |          |                        |      |                 |                              |     |             |                    |      |           |                    |    |           |                     |                  |                     |                     |      |                |               |            |                      |             |         |               |                  |
| Field                                                                                                                                                                                                                                                                                                                                                                               | Value                                                                                                                                                                                                                                                                                                                                                                                                                                                                                                                                                                                                                                                                                                                                             |                              |       |     |                           |      |                                  |      |         |     |         |      |   |    |        |                  |      |      |           |       |       |         |       |        |         |                                                                                                                                                                                                                                                                                                                                                                                                                                                                                                                                                                                                                                                                                                                                                                                                                                                                                                                                                                                                                                                                                        |            |                      |             |     |                  |                        |      |          |                        |      |                 |                              |     |             |                    |      |           |                    |    |           |                     |                  |                     |                     |      |                |               |            |                      |             |         |               |                  |
| country                                                                                                                                                                                                                                                                                                                                                                             | Italy                                                                                                                                                                                                                                                                                                                                                                                                                                                                                                                                                                                                                                                                                                                                             |                              |       |     |                           |      |                                  |      |         |     |         |      |   |    |        |                  |      |      |           |       |       |         |       |        |         |                                                                                                                                                                                                                                                                                                                                                                                                                                                                                                                                                                                                                                                                                                                                                                                                                                                                                                                                                                                                                                                                                        |            |                      |             |     |                  |                        |      |          |                        |      |                 |                              |     |             |                    |      |           |                    |    |           |                     |                  |                     |                     |      |                |               |            |                      |             |         |               |                  |
| domain                                                                                                                                                                                                                                                                                                                                                                              | Cuisine                                                                                                                                                                                                                                                                                                                                                                                                                                                                                                                                                                                                                                                                                                                                           |                              |       |     |                           |      |                                  |      |         |     |         |      |   |    |        |                  |      |      |           |       |       |         |       |        |         |                                                                                                                                                                                                                                                                                                                                                                                                                                                                                                                                                                                                                                                                                                                                                                                                                                                                                                                                                                                                                                                                                        |            |                      |             |     |                  |                        |      |          |                        |      |                 |                              |     |             |                    |      |           |                    |    |           |                     |                  |                     |                     |      |                |               |            |                      |             |         |               |                  |
| Field name                                                                                                                                                                                                                                                                                                                                                                          | Example field values                                                                                                                                                                                                                                                                                                                                                                                                                                                                                                                                                                                                                                                                                                                              | Description                  |       |     |                           |      |                                  |      |         |     |         |      |   |    |        |                  |      |      |           |       |       |         |       |        |         |                                                                                                                                                                                                                                                                                                                                                                                                                                                                                                                                                                                                                                                                                                                                                                                                                                                                                                                                                                                                                                                                                        |            |                      |             |     |                  |                        |      |          |                        |      |                 |                              |     |             |                    |      |           |                    |    |           |                     |                  |                     |                     |      |                |               |            |                      |             |         |               |                  |
| P31                                                                                                                                                                                                                                                                                                                                                                                 | 'Q2095', 'Q7802'                                                                                                                                                                                                                                                                                                                                                                                                                                                                                                                                                                                                                                                                                                                                  | Property 'instance of'       |       |     |                           |      |                                  |      |         |     |         |      |   |    |        |                  |      |      |           |       |       |         |       |        |         |                                                                                                                                                                                                                                                                                                                                                                                                                                                                                                                                                                                                                                                                                                                                                                                                                                                                                                                                                                                                                                                                                        |            |                      |             |     |                  |                        |      |          |                        |      |                 |                              |     |             |                    |      |           |                    |    |           |                     |                  |                     |                     |      |                |               |            |                      |             |         |               |                  |
| P279                                                                                                                                                                                                                                                                                                                                                                                | 'Q13270'                                                                                                                                                                                                                                                                                                                                                                                                                                                                                                                                                                                                                                                                                                                                          | Property 'subclass of'       |       |     |                           |      |                                  |      |         |     |         |      |   |    |        |                  |      |      |           |       |       |         |       |        |         |                                                                                                                                                                                                                                                                                                                                                                                                                                                                                                                                                                                                                                                                                                                                                                                                                                                                                                                                                                                                                                                                                        |            |                      |             |     |                  |                        |      |          |                        |      |                 |                              |     |             |                    |      |           |                    |    |           |                     |                  |                     |                     |      |                |               |            |                      |             |         |               |                  |
| P495                                                                                                                                                                                                                                                                                                                                                                                | 'Q8646', 'Q155'                                                                                                                                                                                                                                                                                                                                                                                                                                                                                                                                                                                                                                                                                                                                   | Property 'country-of-origin' |       |     |                           |      |                                  |      |         |     |         |      |   |    |        |                  |      |      |           |       |       |         |       |        |         |                                                                                                                                                                                                                                                                                                                                                                                                                                                                                                                                                                                                                                                                                                                                                                                                                                                                                                                                                                                                                                                                                        |            |                      |             |     |                  |                        |      |          |                        |      |                 |                              |     |             |                    |      |           |                    |    |           |                     |                  |                     |                     |      |                |               |            |                      |             |         |               |                  |
| P17                                                                                                                                                                                                                                                                                                                                                                                 | 'Q155', Q38                                                                                                                                                                                                                                                                                                                                                                                                                                                                                                                                                                                                                                                                                                                                       | Property 'country'           |       |     |                           |      |                                  |      |         |     |         |      |   |    |        |                  |      |      |           |       |       |         |       |        |         |                                                                                                                                                                                                                                                                                                                                                                                                                                                                                                                                                                                                                                                                                                                                                                                                                                                                                                                                                                                                                                                                                        |            |                      |             |     |                  |                        |      |          |                        |      |                 |                              |     |             |                    |      |           |                    |    |           |                     |                  |                     |                     |      |                |               |            |                      |             |         |               |                  |
| P361                                                                                                                                                                                                                                                                                                                                                                                | 'Q614394'                                                                                                                                                                                                                                                                                                                                                                                                                                                                                                                                                                                                                                                                                                                                         | Property 'part of'           |       |     |                           |      |                                  |      |         |     |         |      |   |    |        |                  |      |      |           |       |       |         |       |        |         |                                                                                                                                                                                                                                                                                                                                                                                                                                                                                                                                                                                                                                                                                                                                                                                                                                                                                                                                                                                                                                                                                        |            |                      |             |     |                  |                        |      |          |                        |      |                 |                              |     |             |                    |      |           |                    |    |           |                     |                  |                     |                     |      |                |               |            |                      |             |         |               |                  |
| id                                                                                                                                                                                                                                                                                                                                                                                  | Q16493207                                                                                                                                                                                                                                                                                                                                                                                                                                                                                                                                                                                                                                                                                                                                         | Wiki ID of artifact          |       |     |                           |      |                                  |      |         |     |         |      |   |    |        |                  |      |      |           |       |       |         |       |        |         |                                                                                                                                                                                                                                                                                                                                                                                                                                                                                                                                                                                                                                                                                                                                                                                                                                                                                                                                                                                                                                                                                        |            |                      |             |     |                  |                        |      |          |                        |      |                 |                              |     |             |                    |      |           |                    |    |           |                     |                  |                     |                     |      |                |               |            |                      |             |         |               |                  |
| parent node name                                                                                                                                                                                                                                                                                                                                                                    | type of dance, dish                                                                                                                                                                                                                                                                                                                                                                                                                                                                                                                                                                                                                                                                                                                               | Name of parent node          |       |     |                           |      |                                  |      |         |     |         |      |   |    |        |                  |      |      |           |       |       |         |       |        |         |                                                                                                                                                                                                                                                                                                                                                                                                                                                                                                                                                                                                                                                                                                                                                                                                                                                                                                                                                                                                                                                                                        |            |                      |             |     |                  |                        |      |          |                        |      |                 |                              |     |             |                    |      |           |                    |    |           |                     |                  |                     |                     |      |                |               |            |                      |             |         |               |                  |
| name                                                                                                                                                                                                                                                                                                                                                                                | Odissi, Osechi                                                                                                                                                                                                                                                                                                                                                                                                                                                                                                                                                                                                                                                                                                                                    | Artifact name                |       |     |                           |      |                                  |      |         |     |         |      |   |    |        |                  |      |      |           |       |       |         |       |        |         |                                                                                                                                                                                                                                                                                                                                                                                                                                                                                                                                                                                                                                                                                                                                                                                                                                                                                                                                                                                                                                                                                        |            |                      |             |     |                  |                        |      |          |                        |      |                 |                              |     |             |                    |      |           |                    |    |           |                     |                  |                     |                     |      |                |               |            |                      |             |         |               |                  |
| Field name                                                                                                                                                                                                                                                                                                                                                                          | Example field values                                                                                                                                                                                                                                                                                                                                                                                                                                                                                                                                                                                                                                                                                                                              | Description                  |       |     |                           |      |                                  |      |         |     |         |      |   |    |        |                  |      |      |           |       |       |         |       |        |         |                                                                                                                                                                                                                                                                                                                                                                                                                                                                                                                                                                                                                                                                                                                                                                                                                                                                                                                                                                                                                                                                                        |            |                      |             |     |                  |                        |      |          |                        |      |                 |                              |     |             |                    |      |           |                    |    |           |                     |                  |                     |                     |      |                |               |            |                      |             |         |               |                  |
| country                                                                                                                                                                                                                                                                                                                                                                             | Brazil, India                                                                                                                                                                                                                                                                                                                                                                                                                                                                                                                                                                                                                                                                                                                                     | Artifact country             |       |     |                           |      |                                  |      |         |     |         |      |   |    |        |                  |      |      |           |       |       |         |       |        |         |                                                                                                                                                                                                                                                                                                                                                                                                                                                                                                                                                                                                                                                                                                                                                                                                                                                                                                                                                                                                                                                                                        |            |                      |             |     |                  |                        |      |          |                        |      |                 |                              |     |             |                    |      |           |                    |    |           |                     |                  |                     |                     |      |                |               |            |                      |             |         |               |                  |

|                                                                                                                                                                                                                                                                | <table><tr><td>artifact</td><td>Spaghetti</td></tr><tr><td>prompt</td><td>A high resolution image of Spaghetti from Italian cuisine, realistic</td></tr></table> <p><b>Above:</b> Example datapoint in CUBE-1K</p>              | artifact                                                                                                                                                                                                                                                                                                                                                                                                                                                                            | Spaghetti | prompt | A high resolution image of Spaghetti from Italian cuisine, realistic | <table><tr><td></td><td></td><td>of association</td></tr><tr><td>domain</td><td>Cuisine, Landmark</td><td>Artifact domain</td></tr><tr><td>artifact</td><td>Dosa, Eiffel Tower</td><td>Artifact name</td></tr><tr><td>prompt</td><td>A high resolution image of Dosa from Indian cuisine, realistic, A panoramic view of Palazzo Eiffel Tower in France, realistic</td><td>T2I prompt</td></tr></table> <p><b>Above:</b> Field description and example field values in CUBE-1K</p> |  |  | of association | domain | Cuisine, Landmark | Artifact domain | artifact | Dosa, Eiffel Tower | Artifact name | prompt | A high resolution image of Dosa from Indian cuisine, realistic, A panoramic view of Palazzo Eiffel Tower in France, realistic | T2I prompt |
|----------------------------------------------------------------------------------------------------------------------------------------------------------------------------------------------------------------------------------------------------------------|---------------------------------------------------------------------------------------------------------------------------------------------------------------------------------------------------------------------------------|-------------------------------------------------------------------------------------------------------------------------------------------------------------------------------------------------------------------------------------------------------------------------------------------------------------------------------------------------------------------------------------------------------------------------------------------------------------------------------------|-----------|--------|----------------------------------------------------------------------|------------------------------------------------------------------------------------------------------------------------------------------------------------------------------------------------------------------------------------------------------------------------------------------------------------------------------------------------------------------------------------------------------------------------------------------------------------------------------------|--|--|----------------|--------|-------------------|-----------------|----------|--------------------|---------------|--------|-------------------------------------------------------------------------------------------------------------------------------|------------|
| artifact                                                                                                                                                                                                                                                       | Spaghetti                                                                                                                                                                                                                       |                                                                                                                                                                                                                                                                                                                                                                                                                                                                                     |           |        |                                                                      |                                                                                                                                                                                                                                                                                                                                                                                                                                                                                    |  |  |                |        |                   |                 |          |                    |               |        |                                                                                                                               |            |
| prompt                                                                                                                                                                                                                                                         | A high resolution image of Spaghetti from Italian cuisine, realistic                                                                                                                                                            |                                                                                                                                                                                                                                                                                                                                                                                                                                                                                     |           |        |                                                                      |                                                                                                                                                                                                                                                                                                                                                                                                                                                                                    |  |  |                |        |                   |                 |          |                    |               |        |                                                                                                                               |            |
|                                                                                                                                                                                                                                                                |                                                                                                                                                                                                                                 | of association                                                                                                                                                                                                                                                                                                                                                                                                                                                                      |           |        |                                                                      |                                                                                                                                                                                                                                                                                                                                                                                                                                                                                    |  |  |                |        |                   |                 |          |                    |               |        |                                                                                                                               |            |
| domain                                                                                                                                                                                                                                                         | Cuisine, Landmark                                                                                                                                                                                                               | Artifact domain                                                                                                                                                                                                                                                                                                                                                                                                                                                                     |           |        |                                                                      |                                                                                                                                                                                                                                                                                                                                                                                                                                                                                    |  |  |                |        |                   |                 |          |                    |               |        |                                                                                                                               |            |
| artifact                                                                                                                                                                                                                                                       | Dosa, Eiffel Tower                                                                                                                                                                                                              | Artifact name                                                                                                                                                                                                                                                                                                                                                                                                                                                                       |           |        |                                                                      |                                                                                                                                                                                                                                                                                                                                                                                                                                                                                    |  |  |                |        |                   |                 |          |                    |               |        |                                                                                                                               |            |
| prompt                                                                                                                                                                                                                                                         | A high resolution image of Dosa from Indian cuisine, realistic, A panoramic view of Palazzo Eiffel Tower in France, realistic                                                                                                   | T2I prompt                                                                                                                                                                                                                                                                                                                                                                                                                                                                          |           |        |                                                                      |                                                                                                                                                                                                                                                                                                                                                                                                                                                                                    |  |  |                |        |                   |                 |          |                    |               |        |                                                                                                                               |            |
| Purpose(s)                                                                                                                                                                                                                                                     | Domain(s) of application                                                                                                                                                                                                        | Primary Motivation                                                                                                                                                                                                                                                                                                                                                                                                                                                                  |           |        |                                                                      |                                                                                                                                                                                                                                                                                                                                                                                                                                                                                    |  |  |                |        |                   |                 |          |                    |               |        |                                                                                                                               |            |
| <ul style="list-style-type: none"><li>Monitoring</li><li>Research</li><li>Production</li><li>Others<ul style="list-style-type: none"><li>Please specify</li></ul></li></ul>                                                                                    | <p><b>Domains</b></p> <p>Text-to-image models, fairness, cultural inclusivity, data collection</p> <p><b>Problem Space</b></p> <p>Measuring cultural competency in existing text-to-image models.</p>                           | <ul style="list-style-type: none"><li>Existing T2I benchmarks evaluate aspects such as image-text alignment, fidelity and aesthetics. Lack of a framework or benchmark to evaluate cultural competence of T2I models</li><li>Lack of any existing broad geo-coverage of cultural artifact collection to serve as grounding.</li><li>Data sources like these will serve as a great starting point and can compliment participatory approaches for cultural data collection</li></ul> |           |        |                                                                      |                                                                                                                                                                                                                                                                                                                                                                                                                                                                                    |  |  |                |        |                   |                 |          |                    |               |        |                                                                                                                               |            |
| Dataset Use(s)                                                                                                                                                                                                                                                 | INTENDED AND/OR SUITABLE USE CASE(S)                                                                                                                                                                                            | UNSUITABLE USE CASE(S)                                                                                                                                                                                                                                                                                                                                                                                                                                                              |           |        |                                                                      |                                                                                                                                                                                                                                                                                                                                                                                                                                                                                    |  |  |                |        |                   |                 |          |                    |               |        |                                                                                                                               |            |
| <ul style="list-style-type: none"><li>Safe for production use</li><li>Safe for research use</li><li>Conditional use- some unsafe applications</li><li>Only approved use</li><li>Others<ul style="list-style-type: none"><li>Please specify</li></ul></li></ul> | <ul style="list-style-type: none"><li>Evaluate cultural awareness of T2I models</li><li>Serve as grounding to evaluate cultural diversity of T2I models</li><li>Compliment future cultural data collection approaches</li></ul> | <ul style="list-style-type: none"><li>As a resource for training production systems</li><li>As a benchmark for assessing fairness or lack of fairness in T2I models</li><li>As an exhaustive resource of cultural artifacts across domains and countries considered</li></ul>                                                                                                                                                                                                       |           |        |                                                                      |                                                                                                                                                                                                                                                                                                                                                                                                                                                                                    |  |  |                |        |                   |                 |          |                    |               |        |                                                                                                                               |            |
| SAFETY OF USE WITH OTHER DATA                                                                                                                                                                                                                                  | ACCEPTABLE TRANSFORMATIONS                                                                                                                                                                                                      | BEST PRACTICES FOR JOINING OR AGGREGATING WITH DATASET                                                                                                                                                                                                                                                                                                                                                                                                                              |           |        |                                                                      |                                                                                                                                                                                                                                                                                                                                                                                                                                                                                    |  |  |                |        |                   |                 |          |                    |               |        |                                                                                                                               |            |

| <p><b>Safe to use with other data</b></p> <p>Conditionally safe to use with other data</p> <p>Should not be used with other data</p> <p>Unknown</p> <p>Others*</p> <p>(Please specify)</p>                                                                                                                                                                                                                                                                                                    | <p><b>Joining with other datasets</b></p> <p><b>Subsampling and splitting</b></p> <p><b>Filtering</b></p> <p><b>Joining input sources</b></p> <p><b>Cleaning missing values</b></p> <p><b>Anomaly detection</b></p> <p><b>Grouping and summarizing</b></p> <p><b>Scaling and reducing</b></p> <p><b>Statistical transformations</b></p> <p><b>Redaction or Anonymization</b></p> <p>Others (please specify)</p> | <p>N/A (we have not attempted to use this dataset with other datasets, but we do not anticipate any issues)</p>                                                                                                                                                                                                                        |
|-----------------------------------------------------------------------------------------------------------------------------------------------------------------------------------------------------------------------------------------------------------------------------------------------------------------------------------------------------------------------------------------------------------------------------------------------------------------------------------------------|-----------------------------------------------------------------------------------------------------------------------------------------------------------------------------------------------------------------------------------------------------------------------------------------------------------------------------------------------------------------------------------------------------------------|----------------------------------------------------------------------------------------------------------------------------------------------------------------------------------------------------------------------------------------------------------------------------------------------------------------------------------------|
| VERSION STATUS                                                                                                                                                                                                                                                                                                                                                                                                                                                                                | DATASET VERSION                                                                                                                                                                                                                                                                                                                                                                                                 | MAINTENANCE PLAN                                                                                                                                                                                                                                                                                                                       |
| <p>Regularly Updated</p> <p>New versions of the dataset have been or will continue to be made available.</p> <p><b>Actively Maintained</b></p> <p>No new versions will be made available, but this dataset will be actively maintained, including but not limited to updates to the data.</p> <p>Limited Maintenance</p> <p>The data will not be updated, but any technical issues will be addressed.</p> <p>Deprecated</p> <p>This dataset is obsolete or is no longer being maintained.</p> | <p><b>Current Version</b> 1.0</p> <p><b>Last Updated</b> 06/2024</p> <p><b>Release Date</b> 06/2024</p>                                                                                                                                                                                                                                                                                                         | <ul style="list-style-type: none"><li>• We might add harder (less popular) artifacts to CUBE-1K intended to evaluate T2I models.</li><li>• We might scale our automated cultural artifact extraction from KB to other domains.</li><li>• We will address any potential issues that may arise during the usage of our dataset</li></ul> |
| ACCESS                                                                                                                                                                                                                                                                                                                                                                                                                                                                                        | RETENTION                                                                                                                                                                                                                                                                                                                                                                                                       | WIPEOUT                                                                                                                                                                                                                                                                                                                                |
| <p>The data will be accessible under CC BY-NC-SA 4.0 License</p>                                                                                                                                                                                                                                                                                                                                                                                                                              | <p><b>N/A</b></p>                                                                                                                                                                                                                                                                                                                                                                                               | <p><b>N/A</b></p>                                                                                                                                                                                                                                                                                                                      |
| <p><b>Provenance   Collection   Method(s) used</b></p>                                                                                                                                                                                                                                                                                                                                                                                                                                        | <p><b>Provenance   Collection   Methodology detail(s)</b></p>                                                                                                                                                                                                                                                                                                                                                   | <p><b>Provenance   Collection   Data Processing</b></p>                                                                                                                                                                                                                                                                                |

|                                                                                                                                                                                                                                                                                                                                                                                                                                             |                                                                                                                                                                                                                                                                                                                                                                                                                                                                                                                                                                                                                                                                                                                                                                                                                                                                                                                                                                                                                                                                                                                                                                       |                                                                                                                                                                                                                                                                                                                                                                                                                    |
|---------------------------------------------------------------------------------------------------------------------------------------------------------------------------------------------------------------------------------------------------------------------------------------------------------------------------------------------------------------------------------------------------------------------------------------------|-----------------------------------------------------------------------------------------------------------------------------------------------------------------------------------------------------------------------------------------------------------------------------------------------------------------------------------------------------------------------------------------------------------------------------------------------------------------------------------------------------------------------------------------------------------------------------------------------------------------------------------------------------------------------------------------------------------------------------------------------------------------------------------------------------------------------------------------------------------------------------------------------------------------------------------------------------------------------------------------------------------------------------------------------------------------------------------------------------------------------------------------------------------------------|--------------------------------------------------------------------------------------------------------------------------------------------------------------------------------------------------------------------------------------------------------------------------------------------------------------------------------------------------------------------------------------------------------------------|
| <ul style="list-style-type: none"><li>• API</li><li>• Artificially Generated</li><li>• Crowdsourced - Paid</li><li>• Crowdsourced - Volunteer</li><li>• Vendor Collection Efforts</li><li>• <b>Scraped or Crawled</b></li><li>• Survey, forms or polls</li><li>• Taken from other existing datasets</li><li>• Unknown</li><li>• To be determined</li><li>• Others<ul style="list-style-type: none"><li>◦ Please Specify</li></ul></li></ul> | <p><b>Source:</b> The data is obtained from WikiData (<a href="https://www.wikidata.org/wiki/Wikidata:Introduction">https://www.wikidata.org/wiki/Wikidata:Introduction</a>). WikiData dump of April 2024 was used.</p> <p><b>Methodology in Brief:</b><br/>We traverse the WikiData knowledge graph and extract nodes (and corresponding properties) that have cultural artifacts associated with a country</p> <p><b>Is this source considered sensitive or high-risk?</b><br/><b>No</b></p> <p><b>Dates of Collection:</b> [04 2024 - 04 2024]</p> <p><b>Primary modality of collected data:</b></p> <ul style="list-style-type: none"><li>• Image Data</li><li>• Text Data</li><li>• <b>Tabular Data</b></li><li>• Audio Data</li><li>• Video Data</li><li>• Time Series</li><li>• Graph Data</li><li>• Geospatial Data</li></ul> <p><b>Update frequency for collected data:</b></p> <ul style="list-style-type: none"><li>• Yearly</li><li>• Quarterly</li><li>• Monthly</li><li>• Biweekly</li><li>• Weekly</li><li>• Daily</li><li>• Hourly</li><li>• <b>Static</b></li><li>• Others<ul style="list-style-type: none"><li>◦ Please specify</li></ul></li></ul> | <p>Simple text-based data filtering was used to remove noisy data. Non-latin node names were filtered. Nodes with inconsistent formatting were filtered out. GPT-4-Turbo was employed to remove incorrectly annotated (country association) artifacts. Existing techniques such as self-refinement and self-critiquing were performed with GPT-4-Turbo to fill in missing artifacts from a country and domain.</p> |
| <b>Provenance   Collection Criteria   Data Selection</b>                                                                                                                                                                                                                                                                                                                                                                                    | <b>Provenance   Collection Criteria   Inclusion Criteria</b>                                                                                                                                                                                                                                                                                                                                                                                                                                                                                                                                                                                                                                                                                                                                                                                                                                                                                                                                                                                                                                                                                                          | <b>Provenance   Collection Criteria   Exclusion Criteria</b>                                                                                                                                                                                                                                                                                                                                                       |
| Wikidata is a structured knowledge base that can be freely edited by humans and machines. It offers a broad geo-coverage of cultural artifacts we are interested in. An algorithmic approach to extract data from a KB offers additional benefits                                                                                                                                                                                           | A cultural artifact node must be a child of one of the manually curated parent nodes in Wikipedia. A cultural artifact node must also contain one or both of 'country-of-origin' and 'country' property. Nodes with inconsistent format are not included.                                                                                                                                                                                                                                                                                                                                                                                                                                                                                                                                                                                                                                                                                                                                                                                                                                                                                                             | Nodes with inconsistent format in Wikidata were filtered out.<br>The artifacts were passed through GPT-4-Turbo to test if the properties or national association were indeed correct. Erroneous nodes were filtered out.                                                                                                                                                                                           |

| <p>such as ease of scaling to other domains</p> <p>LLMs are a great automated tool to refine data and filter data that have a reasonable amount of world knowledge.</p>                                                                                                               | <p>Inclusion Criteria for CUBE-1K: Popularity of the artifacts was estimated using the number of search results. This was used to guide the artifact selection to be made into T2I prompts</p>                                                                                                                                                                                                                                                                                                                                                                                                                                                                                                                                                                                                                                                                                                      |                                                                                                                                                                                                                                                                                                                                                                                                                                                                        |
|---------------------------------------------------------------------------------------------------------------------------------------------------------------------------------------------------------------------------------------------------------------------------------------|-----------------------------------------------------------------------------------------------------------------------------------------------------------------------------------------------------------------------------------------------------------------------------------------------------------------------------------------------------------------------------------------------------------------------------------------------------------------------------------------------------------------------------------------------------------------------------------------------------------------------------------------------------------------------------------------------------------------------------------------------------------------------------------------------------------------------------------------------------------------------------------------------------|------------------------------------------------------------------------------------------------------------------------------------------------------------------------------------------------------------------------------------------------------------------------------------------------------------------------------------------------------------------------------------------------------------------------------------------------------------------------|
| SENSITIVE HUMAN ATTRIBUTES                                                                                                                                                                                                                                                            | SOURCE(S) OF HUMAN ATTRIBUTES                                                                                                                                                                                                                                                                                                                                                                                                                                                                                                                                                                                                                                                                                                                                                                                                                                                                       | RATIONALE FOR COLLECTING HUMAN ATTRIBUTES                                                                                                                                                                                                                                                                                                                                                                                                                              |
| <p>Race</p> <p>Gender</p> <p>Ethnicity</p> <p>Socio-economic status</p> <p><b>Geography</b></p> <p>Language</p> <p>Sexual Orientation</p> <p>Religion</p> <p>Age</p> <p><b>Culture</b></p> <p>Disability</p> <p>Experience or Seniority</p> <p>Others (please specify)</p>            | <p><b>Geography:</b> Each cultural artifact within the collection is associated with a specific country. This association is determined using WikiData and subsequently verified through an LLM. However, it is important to acknowledge that the dataset may contain potentially inaccurate or debatable geographical associations for certain artifacts.</p> <p><b>Culture:</b> The artifacts comprising the collection represent nodes within Wikidata, specifically identified as children of manually selected nodes deemed to contain cultural information. It is acknowledged that this process may introduce noise, potentially resulting in the inclusion of artifacts lacking significant cultural relevance or the omission of niche artifacts. Therefore, this method of cultural data extraction, while serving as a valuable starting point, should not be considered exhaustive.</p> | <p>In line with recent literature, we focus on cultures demarcated by national boundaries. Hence we collect the country association of each node.</p> <p>The cultural artifact collection approach helps in building a broad-coverage collection of cultural artifacts from regions around the globe which we believe is a valuable resource for evaluation of models. Such a resource is non-existent currently and can foster future data collection strategies.</p> |
| TRANSFORMATIONS APPLIED                                                                                                                                                                                                                                                               | FIELDS TRANSFORMED                                                                                                                                                                                                                                                                                                                                                                                                                                                                                                                                                                                                                                                                                                                                                                                                                                                                                  | LIBRARIES AND METHODS USED                                                                                                                                                                                                                                                                                                                                                                                                                                             |
| <p>Anomaly Detection</p> <p>Cleaning Mismatched Values</p> <p>Cleaning Missing Values</p> <p>Converting Data Types</p> <p>Data Aggregation</p> <p>Dimensionality Reduction</p> <p>Joining Input Sources</p> <p>Redaction or Anonymization</p> <p>Others*</p> <p>(*Please specify)</p> | <ul style="list-style-type: none"><li>• Data Points with incorrect country association or incorrect information was dropped</li><li>• GPT-4-Turbo was used to fill in for the missing values. These artifacts only had the 'name' and 'id' field with rest of the fields empty</li></ul>                                                                                                                                                                                                                                                                                                                                                                                                                                                                                                                                                                                                            | <ul style="list-style-type: none"><li>• Publicly available GPT-4-Turbo was used for filtering and expanding artifacts.</li><li>• Publicly available Google Search API was used to aid artifact sampling for CUBE-1K</li></ul>                                                                                                                                                                                                                                          |
| SAMPLING METHOD(S)                                                                                                                                                                                                                                                                    | SAMPLING CHARACTERISTIC(S)                                                                                                                                                                                                                                                                                                                                                                                                                                                                                                                                                                                                                                                                                                                                                                                                                                                                          | <ul style="list-style-type: none"><li>• SAMPLING CRITERIA</li></ul>                                                                                                                                                                                                                                                                                                                                                                                                    |

| Cluster Sampling<br>Haphazard Sampling<br>Multi-stage Sampling<br>Random Sampling<br>Retrospective Sampling<br>Stratified Sampling<br>Systematic Sampling<br><b>Weighted Sampling</b><br>Unknown<br>Unsampled<br>Others*<br>(*Please specify) | 1000 artifacts were sampled to create CUBE-1K prompts.                                                                                                                                                                                                                                                                                                                                                                            | <ul style="list-style-type: none"> <li>An artifact's popularity is estimated using the number of Google search results returned when a local user searches for it. To collect relevant and popular artifact prompts, CUBE-1K artifacts were sampled based on these popularity estimates using weighted sampling, where the probability of an artifact being selected is proportional to its popularity score.</li> </ul>                                                                                                                                                                                                                                                         |
|-----------------------------------------------------------------------------------------------------------------------------------------------------------------------------------------------------------------------------------------------|-----------------------------------------------------------------------------------------------------------------------------------------------------------------------------------------------------------------------------------------------------------------------------------------------------------------------------------------------------------------------------------------------------------------------------------|----------------------------------------------------------------------------------------------------------------------------------------------------------------------------------------------------------------------------------------------------------------------------------------------------------------------------------------------------------------------------------------------------------------------------------------------------------------------------------------------------------------------------------------------------------------------------------------------------------------------------------------------------------------------------------|
| ANNOTATOR TYPE                                                                                                                                                                                                                                | ANNOTATOR BREAKDOWN                                                                                                                                                                                                                                                                                                                                                                                                               | ANNOTATOR DESCRIPTION                                                                                                                                                                                                                                                                                                                                                                                                                                                                                                                                                                                                                                                            |
| N/A (No manual annotation was performed on the dataset)                                                                                                                                                                                       | N/A                                                                                                                                                                                                                                                                                                                                                                                                                               | N/A                                                                                                                                                                                                                                                                                                                                                                                                                                                                                                                                                                                                                                                                              |
| VALIDATION METHOD(S)                                                                                                                                                                                                                          | VALIDATION BREAKDOWN                                                                                                                                                                                                                                                                                                                                                                                                              | DESCRIPTION OF VALIDATION                                                                                                                                                                                                                                                                                                                                                                                                                                                                                                                                                                                                                                                        |
| <b>Data Type Validation</b><br>Range and Constraint Validation<br>Code/cross-reference Validation<br>Structured Validation<br><b>Consistency Validation</b><br>Not Validated<br><b>Others*</b><br>(*potential missing values)                 | <ul style="list-style-type: none"> <li>Validation involved removing or adding entire data points</li> <li>We perform 2 major steps of validation: <ul style="list-style-type: none"> <li>1) Incorrectly annotated data was <b>filtered</b> out using GPT-4-Turbo</li> <li>2) Artifacts that may be <b>missing</b> from the KB collection for a particular country and domain, are filled in by GPT-4-Turbo</li> </ul> </li> </ul> | <ol style="list-style-type: none"> <li>The first step of validation is to ensure the artifact node adhered to the expected data format and contained readable information</li> <li>The second step of validation includes verifying if an artifact indeed belonged to a particular domain. for e.g., "Is the Statue of Liberty a landmark?", and verifying if the artifact associates with the country, for e.g., "Is Sushi part of Japanese cuisine". This validation step is performed using GPT-4-Turbo and erroneous points are removed</li> <li>Potential missing artifacts from a domain and country are identified and added to the collection by GPT-4-Turbo.</li> </ol> |
| ML APPLICATION(S)                                                                                                                                                                                                                             | EVALUATION - RESULTS                                                                                                                                                                                                                                                                                                                                                                                                              | EVALUATION - PROCESS                                                                                                                                                                                                                                                                                                                                                                                                                                                                                                                                                                                                                                                             |



|                                                                                                                                                                                                                                                                                                                                                    |     |     |
|----------------------------------------------------------------------------------------------------------------------------------------------------------------------------------------------------------------------------------------------------------------------------------------------------------------------------------------------------|-----|-----|
| <p>Evaluating cultural competency in T2I models</p> <ol style="list-style-type: none"> <li>1) The prompts in CUBE-1K can be used to test if T2I models can correctly depict cultural artifacts unique to different cultures</li> <li>2) CUBE-CSpace serves as the grounding to evaluate the diversity of T2I models to cultural prompts</li> </ol> | N/A | N/A |
|----------------------------------------------------------------------------------------------------------------------------------------------------------------------------------------------------------------------------------------------------------------------------------------------------------------------------------------------------|-----|-----|

Terms of Art

Concepts and Definitions referenced in this Data Card

| Cultural Artifacts                                                                                                                                                                                                            | Domains                                                                                                                  | Self Refinement & Self-Critiquing                                                                                                                                                                                                                                              |
|-------------------------------------------------------------------------------------------------------------------------------------------------------------------------------------------------------------------------------|--------------------------------------------------------------------------------------------------------------------------|--------------------------------------------------------------------------------------------------------------------------------------------------------------------------------------------------------------------------------------------------------------------------------|
| <p>Definition: A cultural artifact is any tangible or intangible object, creation, or expression that provides information about the culture</p> <p>For e.g, Sushi, Kimono, and Jagannath temple are example of artifacts</p> | <p>Definition: A domain is a distinct category of cultural artifacts</p> <p>For e.g, cuisine, landmarks and clothing</p> | <p>Definition: Strategies in literature To iteratively refine and improve LLM responses</p> <p>(<a href="https://arxiv.org/abs/2303.17651">https://arxiv.org/abs/2303.17651</a>)</p> <p>(<a href="https://arxiv.org/abs/2310.16523">https://arxiv.org/abs/2310.16523</a> )</p> |

Reflections on Data

|                                                              |                                                                                                                                                                                                     |
|--------------------------------------------------------------|-----------------------------------------------------------------------------------------------------------------------------------------------------------------------------------------------------|
| Ingrained Biases in Google Search Results and LLM validation | Since our data is collected and verified automatically, our benchmark may contain biases ingrained in tools used to create this benchmark.                                                          |
| Cultural artifacts not captured by the dataset               | We obtain artifacts from a large database WikiData and use GPT-4-Turbo to fill in gaps. There could exist cultural artifacts not captured in our dataset, despite our best efforts on the contrary. |
