# Supplementary material
Source: ML conference proceedings conference paper supplement (https://openreview.net/forum?id=4351SumKS9)
Supplement: supplementary_material [file attachment]

# Additional Details for Human Evaluation (section 4)

## Annotator Selection

Our annotators were recruited based on the following criteria:

- Be fluent in English
- Be diverse in Gender
- Be from specific countries with familiarity of local culture

## Annotator Distribution

Our annotator pool was distributed across geo-cultural identities:

| Country | # of workers |
|---------|--------------|
| Brazil  | 3            |
| India   | 3            |
| Japan   | 3            |
| Nigeria | 3            |
| Turkey  | 3            |
| Italy   | 3            |
| USA     | 3            |
| France  | 3            |

## Cost of Annotation

Annotators were professional data labellers working as contractors for our vendor and were compensated at rates above the prevalent market rates, and respecting the local regulations regarding minimum wage in their respective countries.
